# Supplementary material for: Stability improvement of a Pt/TiO2 photocatalyst during photocatalytic pure water splitting
Source: Royal Society of Chemistry journal article supplement (doi:10.1039/d2ta06961j), 2022-01-01
Supplement: d2ta06961j1.pdf [file d2ta06961j1.pdf]

## Supplementary Material

### Stability improvement of the Pt/TiO<sub>2</sub> photocatalyst during photocatalytic pure water splitting

Xinyi Zhang,<sup>a,c</sup> Chunling Bo,<sup>a,c</sup> Shuang Cao,<sup>a</sup> Zhijie Cheng,<sup>a</sup> Zhaozhong Xiao,<sup>a</sup>  
Xiaolong Liu,<sup>a</sup> Ting Tan <sup>a,\*</sup> and Lingyu Piao <sup>a,b,\*</sup>

<sup>a</sup> National Center for Nanoscience and Technology, Beijing 100190, China

<sup>b</sup> Center of Materials Science and Optoelectronics Engineering, University of Chinese Academy of Sciences, Beijing 100049, China

<sup>c</sup> University of Chinese Academy of Sciences, Beijing 100049, China

\*Corresponding author.

E-mail address: [tant@nanoctr.cn](mailto:tant@nanoctr.cn) (T. Tan), [piaoly@nanoctr.cn](mailto:piaoly@nanoctr.cn) (L. Piao).

## TABLE OF CONTENTS

|                                                                                                                                                                          |          |
|--------------------------------------------------------------------------------------------------------------------------------------------------------------------------|----------|
| <b>Supplementary material.....</b>                                                                                                                                       | <b>1</b> |
| <b>S1. Supplementary Figures.....</b>                                                                                                                                    | <b>4</b> |
| Fig. S1 The single stability of the Pt/b-TiO <sub>2</sub> NFs photocatalyst.....                                                                                         | 4        |
| Fig. S2 TEM images of the Pt/b-TiO <sub>2</sub> NFs, (A) and (B) show the photocatalyst after 20h and 40h reaction, respectively.....                                    | 5        |
| Fig. S3 (a), (b), (c), and (d) are the TEM images with higher resolution of the Pt/b-TiO <sub>2</sub> NFs after reaction for 0 h, 1 h, 20 h, and 40 h, respectively..... | 6        |
| Fig. S4 (a), (b), (c), and (d) are the HRTEM images of the Pt/b-TiO <sub>2</sub> NFs after reaction for 0 h, 1 h, 20 h, and 40 h, respectively.....                      | 7        |
| Fig. S5 Statistical histogram of Pt nanoparticles size distribution after reaction for 0 h, 1 h, 20 h, and 40h, respectively.....                                        | 8        |
| Fig. S6 EPR spectra of the Pt/b-TiO <sub>2</sub> NFs soaked in H <sub>2</sub> O <sub>2</sub> for 20 h and 40 h, respectively.....                                        | 9        |
| Fig. S7 UV-Vis absorption spectra of the Pt/b-TiO <sub>2</sub> NFs immersed in H <sub>2</sub> O and H <sub>2</sub> O <sub>2</sub> .....                                  | 10       |
| Fig. S8 Photoluminescence emission spectra of the Pt/b-TiO <sub>2</sub> NFs immersed in H <sub>2</sub> O and H <sub>2</sub> O <sub>2</sub> . ....                        | 11       |
| Fig. S9 Simulation diagram of in-situ photocatalyst regeneration strategy.....                                                                                           | 12       |
| Fig. S10 The UV spectra for o-tolidine oxidation test of detecting peroxide.....                                                                                         | 13       |
| Fig. S11 UV-Vis absorption spectra of the fresh, reacted for 40 h, and regenerated Pt/b-TiO <sub>2</sub> NFs photocatalyst.....                                          | 14       |
| Fig. S12 Photocurrent I-t curves of the fresh, reacted for 40 h, and regenerated photocatalyst Pt/b-TiO <sub>2</sub> NFs.....                                            | 15       |
| Fig. S13 Photoluminescence emission spectra of the fresh, reacted for 40 h, and regenerated photocatalyst Pt/b-TiO <sub>2</sub> NFs.....                                 | 16       |
| Fig. S14 XPS spectra of (a) O 1s, (b) Ti 2p and (c) Pt 4f of the fresh, reacted for 40 h, and regenerated photocatalyst Pt/b-TiO <sub>2</sub> NFs.....                   | 17       |
| Fig. S15 FTIR spectra of the fresh, reacted for 40 h, and regenerated photocatalyst                                                                                      |          |

|                                                                                                                          |           |
|--------------------------------------------------------------------------------------------------------------------------|-----------|
| Pt/b-TiO <sub>2</sub> NFs.....                                                                                           | 18        |
| <b>S2. Supplementary Tables .....</b>                                                                                    | <b>19</b> |
| Table. S1 Quantitative analysis of Pt/b-TiO <sub>2</sub> NFs after 0 h, 1 h, 20 h, and 40 h of UV light irradiation..... | 19        |
| Table. S2 Comparison of data on the stability of photocatalysts for photocatalytic overall water splitting.....          | 20        |

## S1. Supplementary Figures

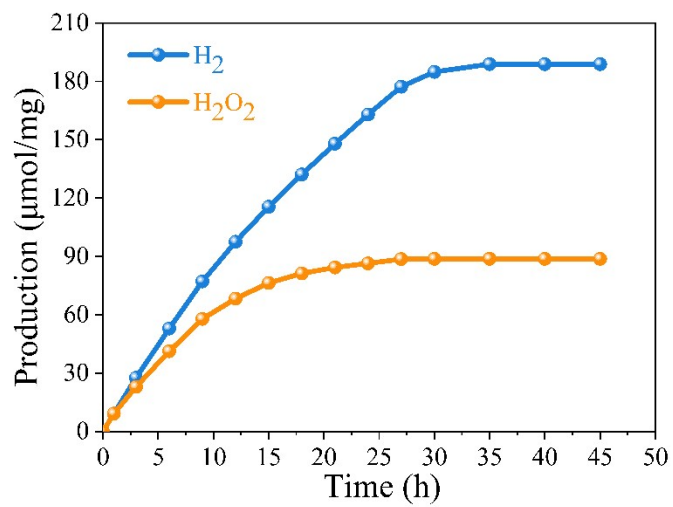

**Fig. S1** The single stability of the Pt/b-TiO<sub>2</sub> NFs photocatalyst.

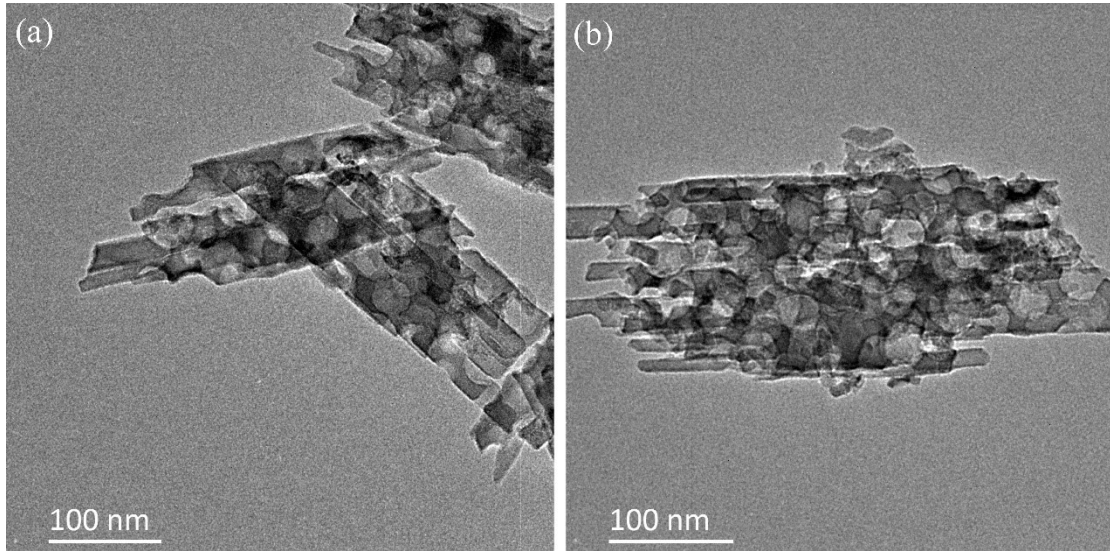

**Fig. S2** TEM images of the Pt/b-TiO<sub>2</sub> NFs, (a) and (b) show the photocatalyst after 20 h and 40 h reaction, respectively.

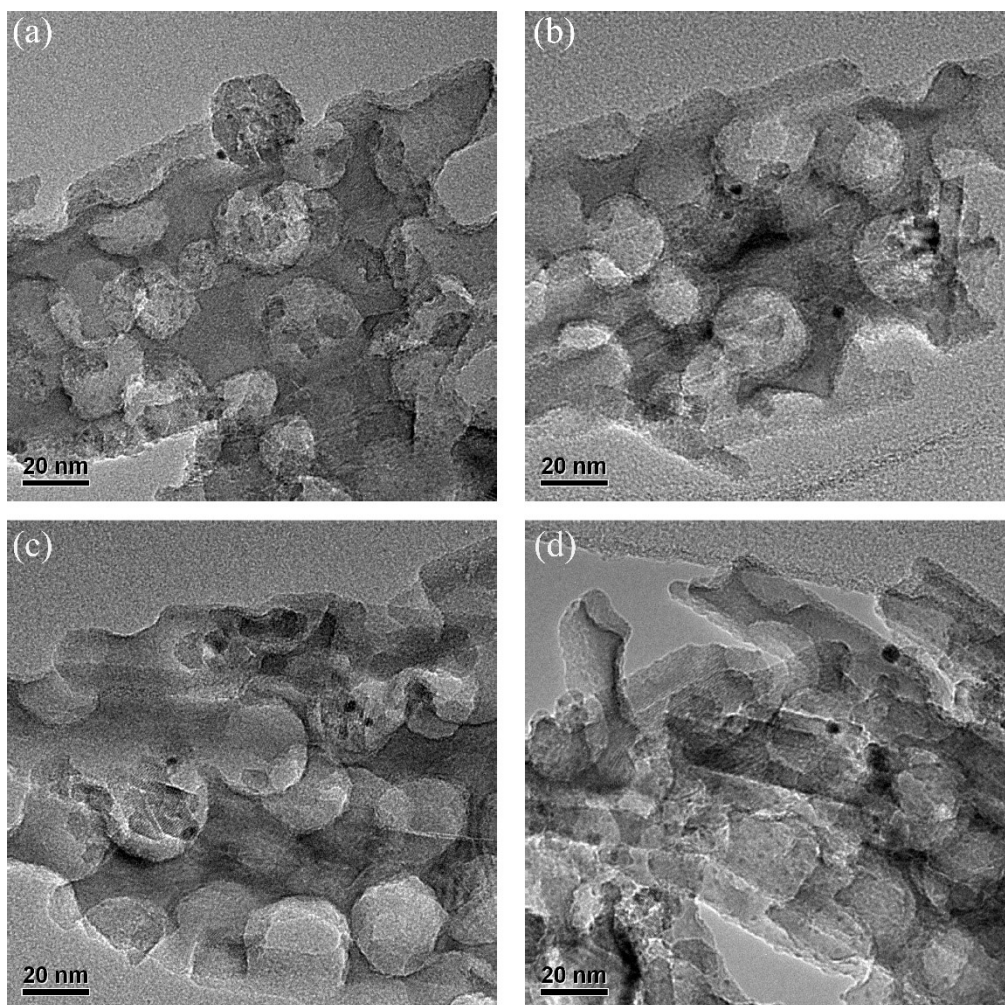

**Fig. S3** (a), (b), (c), and (d) are the TEM images with higher resolution of the Pt/b-TiO<sub>2</sub> NFs after reaction for 0 h, 1 h, 20 h, and 40 h, respectively.

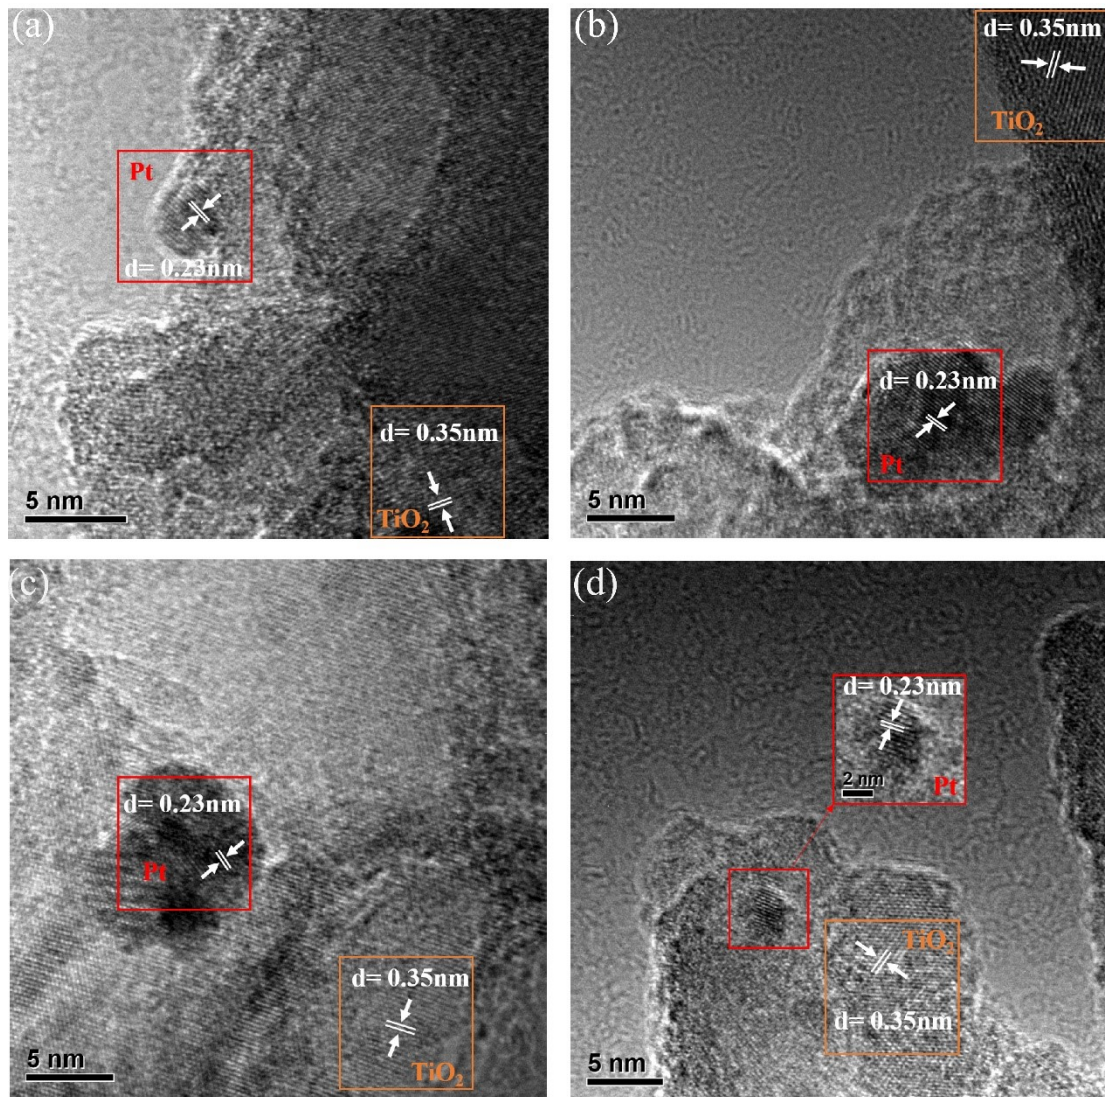

**Fig. S4** (a), (b), (c), and (d) are the HRTEM images of the Pt/b-TiO<sub>2</sub> NFs after reaction for 0 h, 1 h, 20 h, and 40 h, respectively.



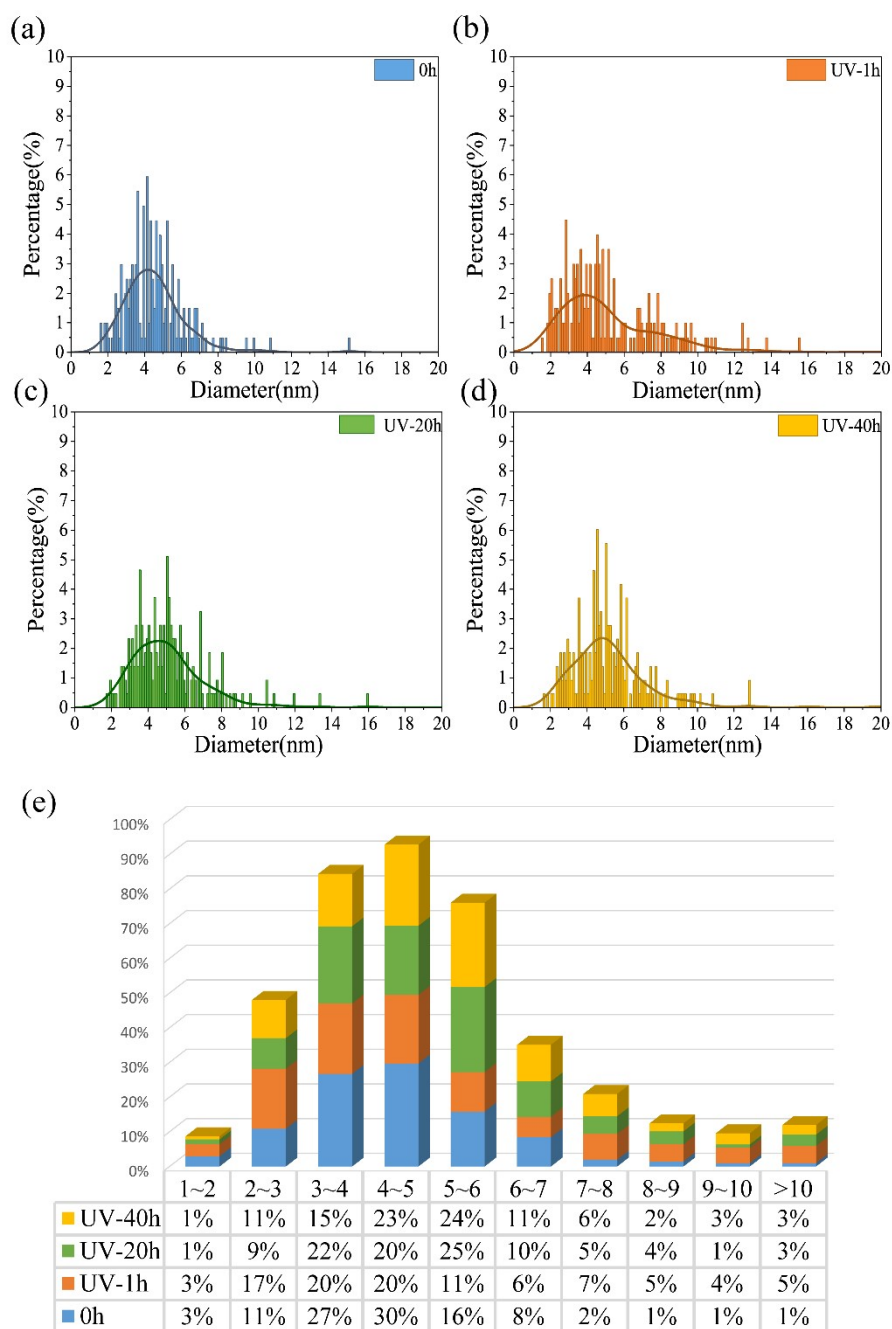

**Fig. S5** (a), (b), (c), (d) are the statistical histogram of Pt nanoparticles size distribution after reaction for 0 h, 1 h, 20 h, and 40 h, respectively. (e) Statistical chart of Pt particle size percentage after the reaction for 0 h, 1 h, 20 h, and 40h.

The average dimensions (a) of  $5.0 \pm 1.7$  nm (Mean of  $N = 200$  measurements,  $\pm$  SD) are Pt before the reaction (0h). And  $5.2 \pm 2.7$  nm (b),  $5.1 \pm 2.3$  nm (c), and  $5.3 \pm 2.3$  nm (d) are average dimensions of Pt nanoparticles after the reaction for 1 h, 20 h, and 40 h, respectively. Particle sizes are all concentrated at 4~6 nm (Fig. S3e), and there is no obvious change before and after the reaction.



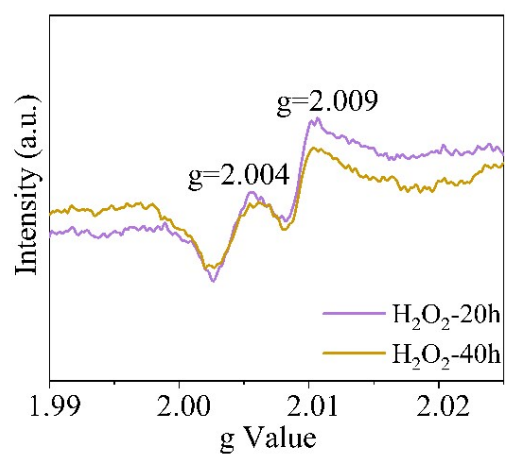

**Fig. S6** EPR spectra of the Pt/b-TiO<sub>2</sub> NFs soaked in H<sub>2</sub>O<sub>2</sub> for 20 h and 40 h, respectively.

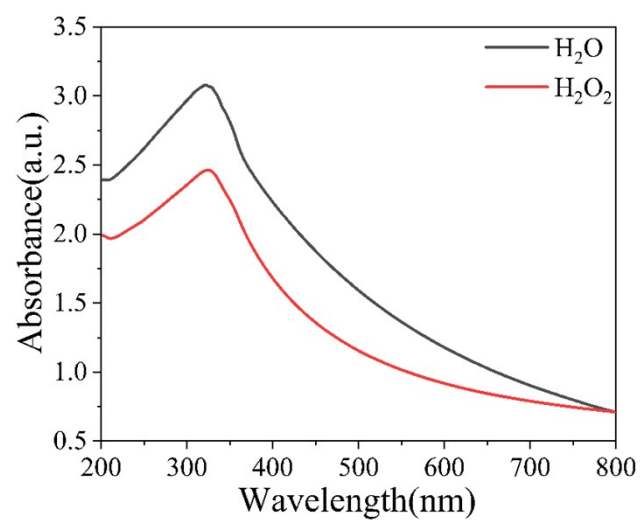

**Fig. S7** UV-Vis absorption spectra of the Pt/b-TiO<sub>2</sub> NFs immersed in H<sub>2</sub>O and H<sub>2</sub>O<sub>2</sub>. The H<sub>2</sub>O<sub>2</sub> concentration here is the same as the H<sub>2</sub>O<sub>2</sub> concentration under reaction conditions.

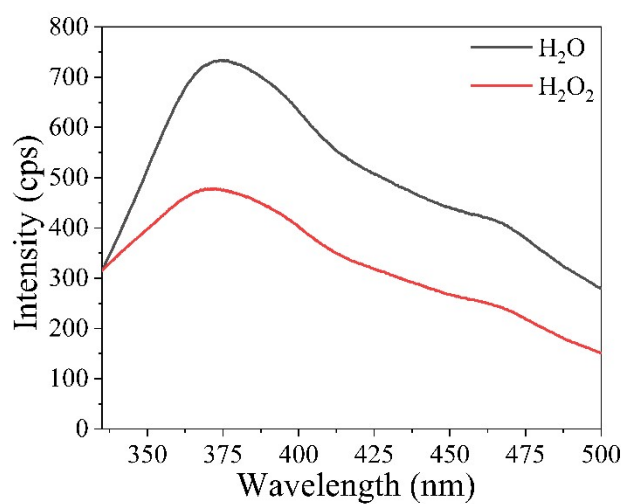

**Fig. S8** Photoluminescence emission spectra of the Pt/b-TiO<sub>2</sub> NFs immersed in H<sub>2</sub>O and H<sub>2</sub>O<sub>2</sub>. The H<sub>2</sub>O<sub>2</sub> concentration here is the same as the H<sub>2</sub>O<sub>2</sub> concentration under reaction conditions.

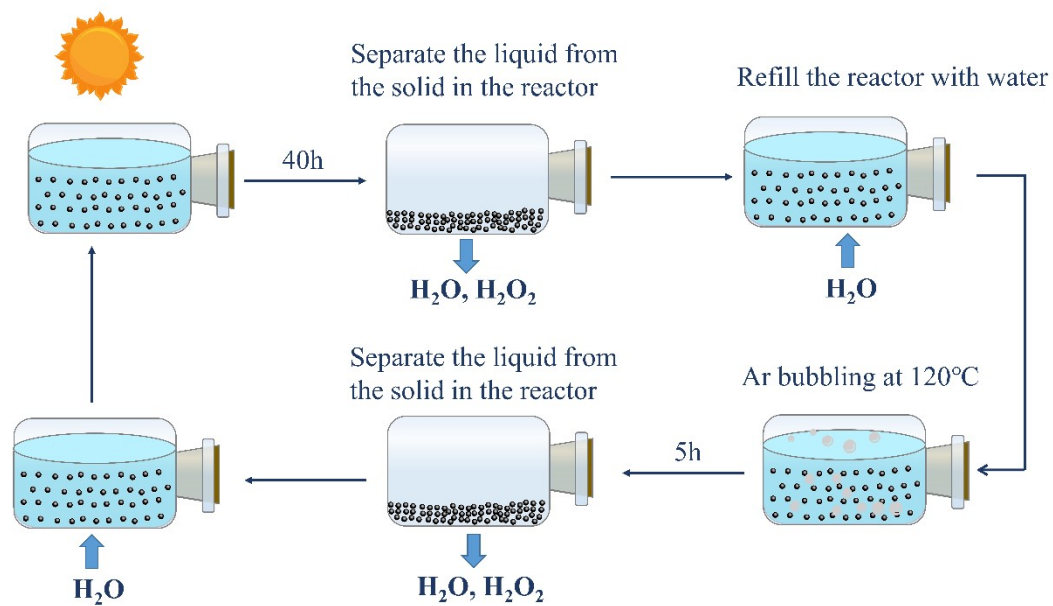

**Fig. S9** Simulation diagram of in-situ photocatalyst regeneration strategy.

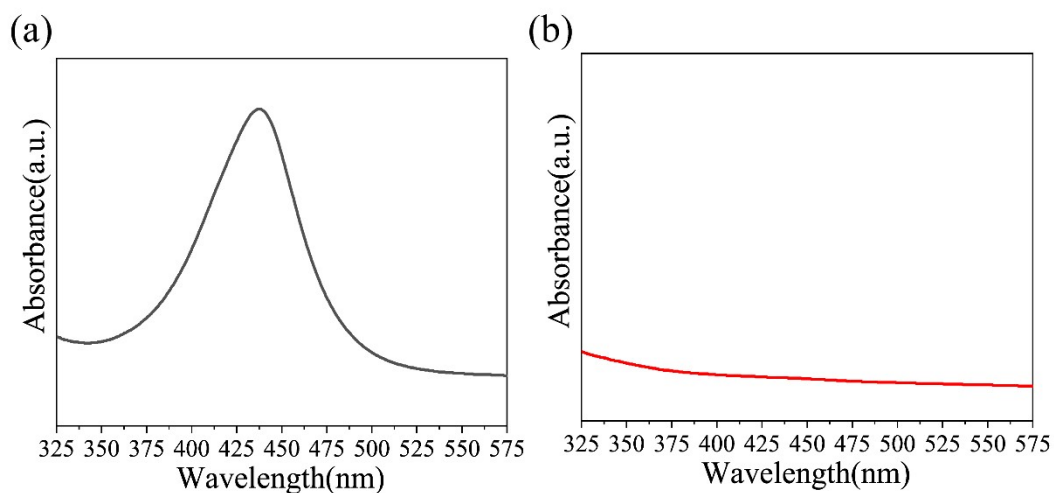

**Fig. S10** The UV spectra for *o*-tolidine oxidation test of detecting peroxides. (a) the Pt/b-TiO<sub>2</sub> NFs photocatalyst after 40 h reaction, (b) the regenerated Pt/b-TiO<sub>2</sub> NFs photocatalyst. The Pt/b-TiO<sub>2</sub> NFs photocatalyst after 40 h reaction has strong characteristic absorption at 438 nm, indicating that H<sub>2</sub>O<sub>2</sub> is adsorbed on the photocatalyst surface. The regenerated sample does not have this characteristic absorption peak, indicating that there is no H<sub>2</sub>O<sub>2</sub> adsorbed on the surface of the regenerated photocatalyst.

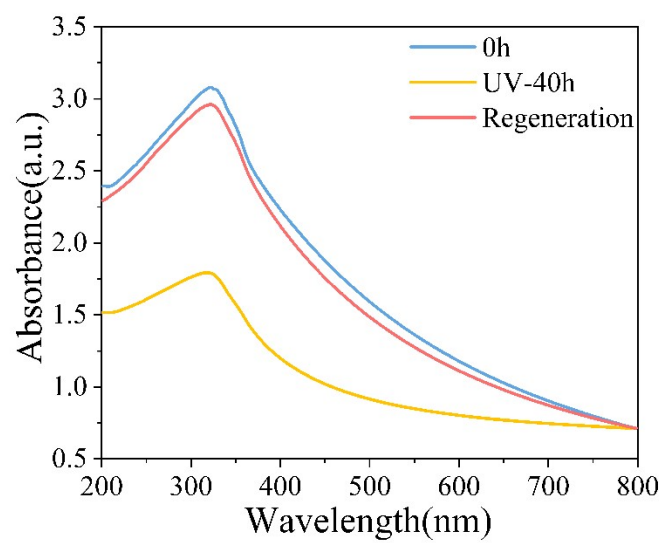

**Fig. S11** UV-Vis absorption spectra of the fresh, reacted for 40 h, and regenerated Pt/b-TiO<sub>2</sub> NFs photocatalyst.

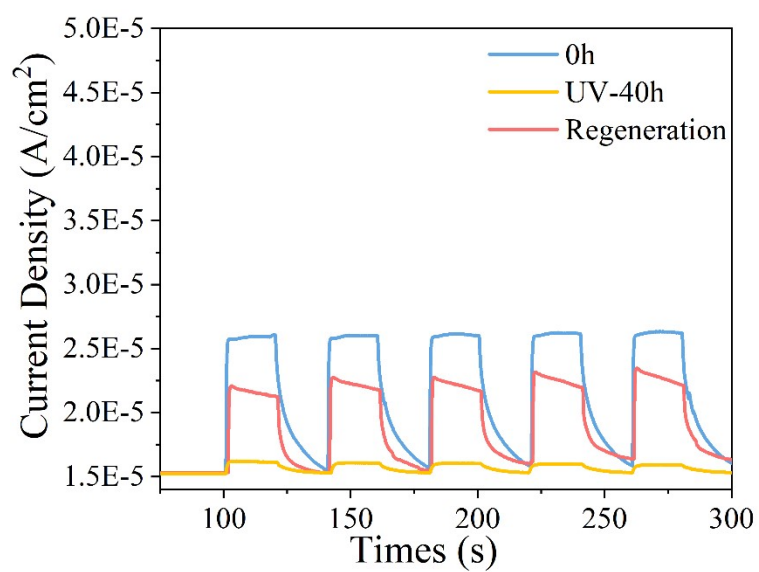

**Fig. S12** Photocurrent I-t curves of the fresh, reacted for 40 h, and regenerated Pt/b-TiO<sub>2</sub> NFs photocatalyst.



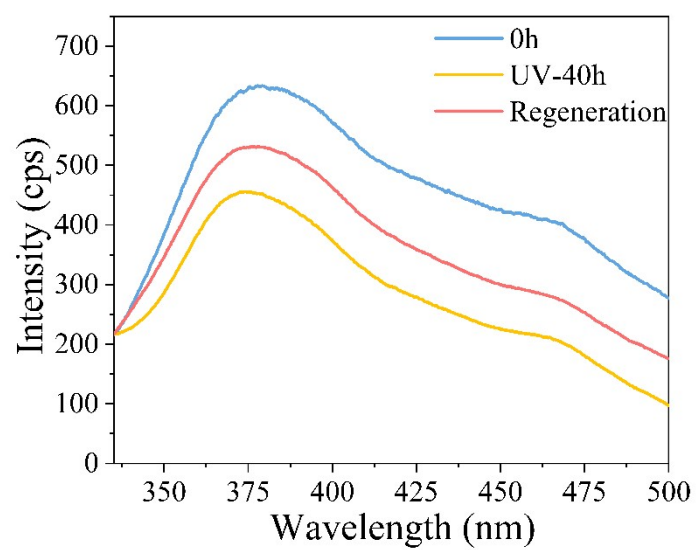

**Fig. S13** Photoluminescence emission spectra of the fresh, reacted for 40 h, and regenerated Pt/b-TiO<sub>2</sub> NFs photocatalyst.

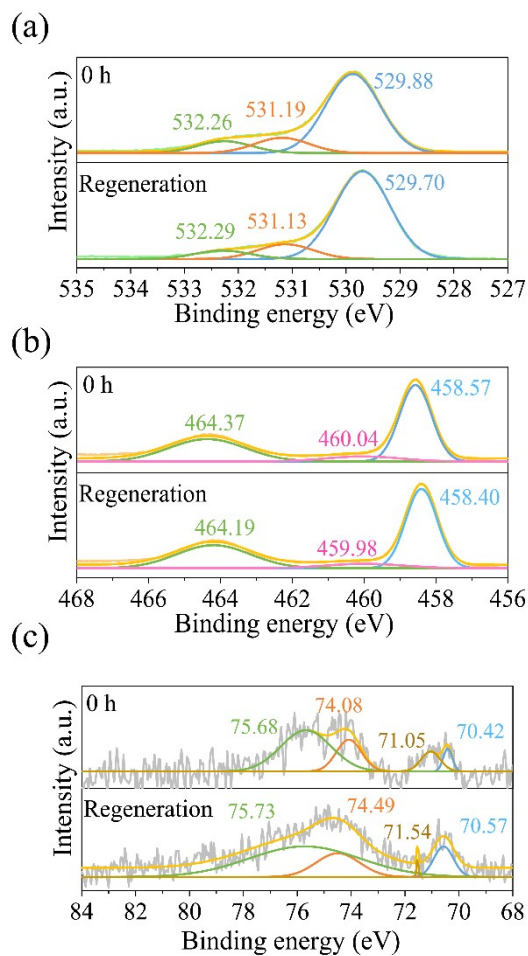

**Fig. S14** XPS spectra of (a) O 1s, (b) Ti 2p and (c) Pt 4f of the fresh, reacted for 40 h, and regenerated Pt/b-TiO<sub>2</sub> NFs photocatalyst.

Most of the regenerated Pt could not return to the initial state, because the content of Pt<sup>2+</sup> gradually increased with the progress of the photocatalytic pure water splitting reaction, and the bubbling regeneration method could not reduce the content of oxidized Pt.

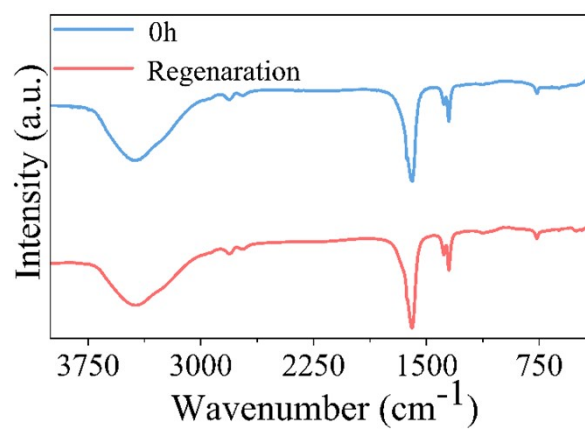

**Fig. S15** FTIR spectra of the fresh, reacted for 40 h, and regenerated Pt/b-TiO<sub>2</sub> NFs photocatalyst.

## S2. Supplementary Tables

**Table. S1** Quantitative analysis of Pt/b-TiO<sub>2</sub> NFs after 0 h, 1 h, 20 h, and 40 h of UV light irradiation.

|                     | <b>Lattice oxygen<br/>(Ti-O)</b> | <b>Surface Hydroxyl<br/>(Ti-OH)</b> | <b>Physisorbed Water</b> |
|---------------------|----------------------------------|-------------------------------------|--------------------------|
| <b>0h</b>           | 74.47%                           | 14.36%                              | 11.17%                   |
| <b>UV-1h</b>        | 63.14%                           | 20.85%                              | 16.01%                   |
| <b>UV-20h</b>       | 64.17%                           | 18.37%                              | 17.46%                   |
| <b>UV-40h</b>       | 73.15%                           | 15.77%                              | 11.09%                   |
| <b>Regeneration</b> | 79.11%                           | 13.30%                              | 7.59%                    |

|                     | <b>Ti<sup>4+</sup> 2p<sub>5/2</sub></b> | <b>Ti<sup>3+</sup> 2p<sub>5/2</sub></b> | <b>Ti<sup>4+</sup> 2p<sub>3/2</sub></b> |
|---------------------|-----------------------------------------|-----------------------------------------|-----------------------------------------|
| <b>0h</b>           | 53.87%                                  | 8.48%                                   | 37.65%                                  |
| <b>UV-1h</b>        | 68.00%                                  | 6.75%                                   | 25.25%                                  |
| <b>UV-20h</b>       | 68.90%                                  | 7.95%                                   | 23.15%                                  |
| <b>UV-40h</b>       | 69.56%                                  | 5.28%                                   | 25.15%                                  |
| <b>Regeneration</b> | 55.07%                                  | 7.60%                                   | 37.33%                                  |

|                     | <b>Pt<sup>0</sup> 4f<sub>7/2</sub></b> | <b>Pt<sup>0</sup> 4f<sub>5/2</sub></b> | <b>Pt<sup>2+</sup> 4f<sub>7/2</sub></b> | <b>Pt<sup>2+</sup> 4f<sub>5/2</sub></b> |
|---------------------|----------------------------------------|----------------------------------------|-----------------------------------------|-----------------------------------------|
| <b>0h</b>           | 5.90%                                  | 23.13%                                 | 11.07%                                  | 59.90%                                  |
| <b>UV-1h</b>        | 17.44%                                 | 46.36%                                 | 0.95%                                   | 35.25%                                  |
| <b>UV-20h</b>       | 13.02%                                 | 19.67%                                 | 4.06%                                   | 63.25%                                  |
| <b>UV-40h</b>       | 13.02%                                 | 19.66%                                 | 4.05%                                   | 63.27%                                  |
| <b>Regeneration</b> | 11.95%                                 | 20.39%                                 | 0.71%                                   | 67.05%                                  |

**Table. S2** Comparison of data on the stability of photocatalysts for photocatalytic overall water splitting. In the past three years, the highest stability time was 216 h, and 95% of them were stable for 20~30 h.

| Reference                                                                                                                                                                                                                                                            | Stability | Image                                                                                |
|----------------------------------------------------------------------------------------------------------------------------------------------------------------------------------------------------------------------------------------------------------------------|-----------|--------------------------------------------------------------------------------------|
| <p>Self-assembly photocatalytic reduction synthesis of graphene-encapsulated <math>\text{LaNiO}_3</math> nanoreactor with high efficiency and stability for photocatalytic water splitting to hydrogen, <i>Chemical Engineering Journal</i>, 2018, 356, 580-591.</p> | 36 h      | 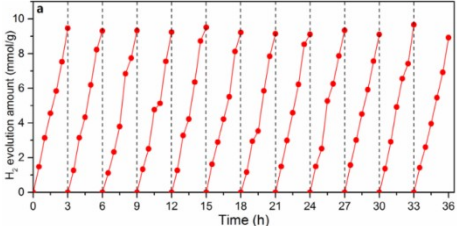   |
| <p>Highly efficient photocatalytic overall water splitting on plasmonic <math>\text{Cu}_6\text{Sn}_5</math>/polyaniline nanocomposites, <i>Journal of Colloid and Interface Science</i>, 2021, 609, 785-793.</p>                                                     | 20 h      |  |
| <p><math>\text{CdS}@\text{Mg}(\text{OH})_2</math> core/shell composite photocatalyst for efficient visible-light photocatalytic overall water splitting, <i>International Journal of Hydrogen Energy</i>, 2022, 47(14), 8729-8738.</p>                               | 20 h      |  |

|                                                                                                                                                                                                                                                         |             |                                                                                                                                                                                                                                                                                                                                                                                                                                                                                                                                                                |
|---------------------------------------------------------------------------------------------------------------------------------------------------------------------------------------------------------------------------------------------------------|-------------|----------------------------------------------------------------------------------------------------------------------------------------------------------------------------------------------------------------------------------------------------------------------------------------------------------------------------------------------------------------------------------------------------------------------------------------------------------------------------------------------------------------------------------------------------------------|
| <p>Switching from two-electron to four-electron photocatalytic pure water splitting via band bending engineering with boosted activity, <i>Applied Catalysis B: Environmental</i>, 2022, 305, 121054-121054.</p>                                        | <p>15 h</p> | 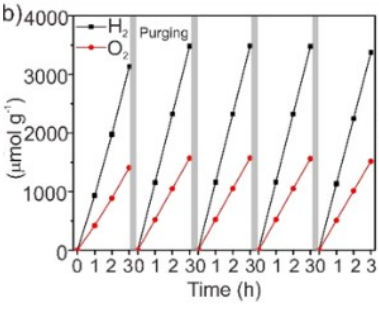 <p>Graph b) shows the evolution of H<sub>2</sub> (black squares) and O<sub>2</sub> (red circles) in μmol g<sup>-1</sup> over time (h). The y-axis ranges from 0 to 4000. The x-axis shows a series of 3-hour intervals, each followed by a 'Purging' period. H<sub>2</sub> evolution reaches approximately 3500 μmol g<sup>-1</sup> after each 3-hour interval, while O<sub>2</sub> evolution reaches approximately 1500 μmol g<sup>-1</sup>.</p>                           |
| <p>Enhanced photoelectrochemical performances in photocatalytic pollutant degradation and water splitting by direct Z-scheme Bi<sub>2</sub>Sn<sub>2</sub>O<sub>7</sub>/TiO<sub>2</sub> NTAs, <i>Ceramics International</i>, 2022, 48(3), 3941-3953.</p> | <p>14 h</p> |  <p>Graph c) shows H<sub>2</sub> generation (μmol/cm<sup>2</sup>) versus irradiation time (h). The y-axis ranges from 0 to 1200. The x-axis ranges from 0 to 14 hours. The data points are shown in black, red, blue, and pink, indicating a linear increase in H<sub>2</sub> generation over time, reaching approximately 1000 μmol/cm<sup>2</sup> at 14 hours.</p>                                                                                                         |
| <p>Layered g-C<sub>3</sub>N<sub>4</sub>/TiO<sub>2</sub> nanocomposites for efficient photocatalytic water splitting and CO<sub>2</sub> reduction: a review, <i>Materials Today Energy</i>, 2022, 23, 100904-100904.</p>                                 | <p>25 h</p> |  <p>Graph f) shows stability (a.u.) versus time (h). The y-axis ranges from 0 to 1.0. The x-axis ranges from 0 to 25 hours. The data points are shown in black, red, blue, purple, and green, indicating a linear increase in stability over time, reaching approximately 1.0 at 25 hours.</p>                                                                                                                                                                              |
| <p>Fabrication of 0D/2D TiO<sub>2</sub> Nanodots/g-C<sub>3</sub>N<sub>4</sub> S-scheme heterojunction photocatalyst for efficient photocatalytic overall water splitting, <i>Applied Surface Science</i>, 2022, 571, 151287-151287.</p>                 | <p>16 h</p> |  <p>Graph (b) shows gas evolution (μmol g<sup>-1</sup>h<sup>-1</sup>) versus irradiation time (h). The y-axis ranges from 0 to 900. The x-axis ranges from 0 to 16 hours. The data points are shown in black (H<sub>2</sub>) and red (O<sub>2</sub>), indicating a linear increase in gas evolution over time, reaching approximately 750 μmol g<sup>-1</sup>h<sup>-1</sup> for H<sub>2</sub> and 350 μmol g<sup>-1</sup>h<sup>-1</sup> for O<sub>2</sub> at 16 hours.</p> |
| <p>Band structure-controlled P-C<sub>3</sub>N<sub>4</sub> for photocatalytic water splitting via appropriately decreasing oxidation capacity, <i>Journal of Alloys and Compounds</i>, 2022, 895, 162513-162513.</p>                                     | <p>15 h</p> |  <p>Graph b) shows gas evolution (μmol) versus reaction time (h). The y-axis ranges from 0.0 to 4.0. The x-axis ranges from 0 to 5 hours. The data points are shown in green (H<sub>2</sub>) and blue (O<sub>2</sub>), indicating a linear increase in gas evolution over time, reaching approximately 3.8 μmol for H<sub>2</sub> and 1.5 μmol for O<sub>2</sub> at 5 hours.</p>                                                                                           |

|                                                                                                                                                                                                                                                                                                          |             |                                                                                      |
|----------------------------------------------------------------------------------------------------------------------------------------------------------------------------------------------------------------------------------------------------------------------------------------------------------|-------------|--------------------------------------------------------------------------------------|
| <p>Heat treatment to prepare boron doped g-C<sub>3</sub>N<sub>4</sub> nanodots/carbon-rich g-C<sub>3</sub>N<sub>4</sub> nanosheets heterojunction with enhanced photocatalytic performance for water splitting hydrogen evolution, <i>Journal of Alloys and Compounds</i>, 2022, 898, 162846-162846.</p> | <p>15 h</p> | 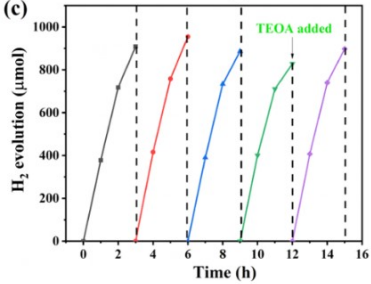   |
| <p>The photocatalytic overall water splitting hydrogen production of g-C<sub>3</sub>N<sub>4</sub>/CdS hollow core-shell heterojunction via the HER/OER matching of Pt/MnO<sub>x</sub>, <i>Chemical Engineering Journal</i>, 2021, 405, 126622-126622.</p>                                                | <p>24 h</p> |    |
| <p>Synthesis of CdS/CoP hollow nanocages with improved photocatalytic water splitting performance for hydrogen evolution, <i>Journal of Environmental Chemical Engineering</i>, 2021, 9(6), 106270-106270</p>                                                                                            | <p>20 h</p> |  |
| <p>Photocatalytic hydrogen generation via water splitting using ZIF-67 derived Co<sub>3</sub>O<sub>4</sub>@C/TiO<sub>2</sub>, <i>Journal of Environmental Chemical Engineering</i>, 2021, 9(4), 105702-105702.</p>                                                                                       | <p>20 h</p> |  |



|                                                                                                                                                                                                                                                                              |              |                                                                                      |
|------------------------------------------------------------------------------------------------------------------------------------------------------------------------------------------------------------------------------------------------------------------------------|--------------|--------------------------------------------------------------------------------------|
| <p>2D/2D heterostructure of ultrathin BiVO<sub>4</sub>/Ti<sub>3</sub>C<sub>2</sub> nanosheets for photocatalytic overall Water splitting, Applied Catalysis B: Environmental, 2021, 285, 119855-119855.</p>                                                                  | <p>24 h</p>  | 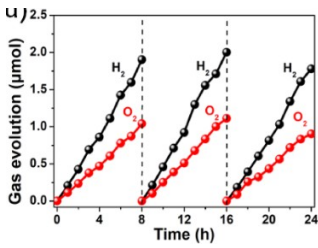   |
| <p>Photocatalytic overall water splitting without noble-metal: Decorating CoP on Al-doped SrTiO<sub>3</sub>, Journal of Colloid and Interface Science, 2022, 606, 491-499.</p>                                                                                               | <p>9 h</p>   |    |
| <p>Facile synthesis of anatase/rutile TiO<sub>2</sub>/g-C<sub>3</sub>N<sub>4</sub> multi-heterostructure for efficient photocatalytic overall water splitting, International Journal of Hydrogen Energy, 2020, 45(35), 17378-17387.</p>                                      | <p>12 h</p>  |   |
| <p>Novel Z-scheme binary zinc tungsten oxide/nickel ferrite nano hybrids for photocatalytic reduction of chromium (Cr (VI)), photoelectrochemical water splitting and degradation of toxic organic pollutants, Journal of Hazardous Materials, 2022, 423, 127044-127044.</p> | <p>~10 h</p> |  |

|                                                                                                                                                                                                                                  |             |                                                                                      |
|----------------------------------------------------------------------------------------------------------------------------------------------------------------------------------------------------------------------------------|-------------|--------------------------------------------------------------------------------------|
| <p>Overall photocatalytic water splitting by an organolead iodide crystalline material, <i>Nature Catalysis</i>, 2020, 3(12), 1027-1033.</p>                                                                                     | <p>15 h</p> | 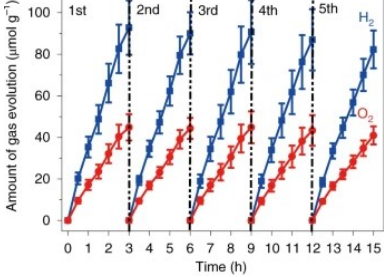   |
| <p>Boron-doped nitrogen-deficient carbon nitride-based Z-scheme heterostructures for photocatalytic overall water splitting, <i>Nature Energy</i>, 2021, 6(4), 388-397.</p>                                                      | <p>32 h</p> |    |
| <p>Single-atom Cu anchored catalysts for photocatalytic renewable H<sub>2</sub> production with a quantum efficiency of 56%, <i>Nature Communications</i>, 2022, 13(1), 1-10.</p>                                                | <p>30 h</p> |   |
| <p>The high photocatalytic efficiency and stability of LaNiO<sub>3</sub>/g-C<sub>3</sub>N<sub>4</sub> heterojunction nanocomposites for photocatalytic water splitting to hydrogen, <i>BMC chemistry</i>, 2022, 14(1), 1-13.</p> | <p>20 h</p> |  |
| <p>Introducing spin polarization into atomically thin 2D carbon nitride sheets for greatly extended visible-light photocatalytic water splitting, <i>Nano Energy</i>, 2021, 83, 105783-105783.</p>                               | <p>16 h</p> |  |
| <p>Z-scheme photocatalyst Pt/GaP-TiO<sub>2</sub>-SiO<sub>2</sub>: Rh for the separated H<sub>2</sub> evolution from photocatalytic seawater splitting, <i>Applied Catalysis B: Environmental</i>, 2021, 296,</p>                 | <p>16 h</p> |  |

|                                                                                                                                                                                                                                                                                                        |      |                                                                                      |
|--------------------------------------------------------------------------------------------------------------------------------------------------------------------------------------------------------------------------------------------------------------------------------------------------------|------|--------------------------------------------------------------------------------------|
| 120339-120339.                                                                                                                                                                                                                                                                                         |      |                                                                                      |
| Holey defected TiO <sub>2</sub> nanosheets with oxygen vacancies for efficient photocatalytic hydrogen production from water splitting, <i>Surfaces and Interfaces</i> , 2021, 23, 100979-100979.                                                                                                      | 25 h | 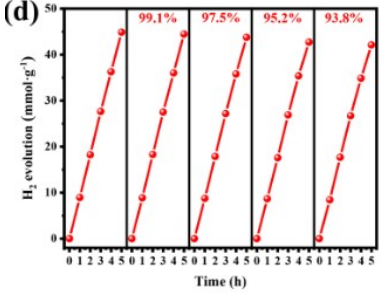   |
| Single 2D MXene precursor-derived TiO <sub>2</sub> nanosheets with a uniform decoration of amorphous carbon for enhancing photocatalytic water splitting, <i>Applied Catalysis B: Environmental</i> , 2020, 270, 118885-118885.                                                                        | 16 h |    |
| Z-scheme heterojunction through interface engineering for broad spectrum photocatalytic water splitting, <i>Applied Catalysis B: Environmental</i> , 2020, 267, 118661-118661.                                                                                                                         | 30 h |   |
| CdS@Ni <sub>3</sub> (NO <sub>3</sub> ) <sub>2</sub> (OH) <sub>4</sub> nanorods@nanosheets for boosted photocatalytic H <sub>2</sub> generation rate and stability under visible light irradiation, <i>Colloids and Surfaces A: Physicochemical and Engineering Aspects</i> , 2022, 639, 128352-128352. | 20 h |  |

|                                                                                                                                                                                                   |             |  |
|---------------------------------------------------------------------------------------------------------------------------------------------------------------------------------------------------|-------------|--|
| <p>Overall water splitting on surface-polarized Sn<sub>3</sub>O<sub>4</sub> through weakening the trap of Sn(II) to holes, Applied Catalysis B: Environmental, 2021, 299, 120689-120689.</p>      | <p>15 h</p> |  |
| <p>Surface-Polarity-Induced Spatial Charge Separation Boosts Photocatalytic Overall Water Splitting on GaN Nanorod Arrays, Angewandte Chemie, 2020, 132(2), 945-952.</p>                          | <p>9 h</p>  |  |
| <p>Atomically thin PdSe<sub>3</sub> nanosheets: a promising 2D photocatalyst produced by quaternary ammonium intercalation and exfoliation, Chemical Communications, 2020, 56(41), 5504-5507.</p> | <p>33 h</p> |  |
| <p>La, Al-Codoped SrTiO<sub>3</sub> as a Photocatalyst in Overall Water Splitting: Significant Surface Engineering Effects on Defect Engineering, ACS Catalysis, 2021, 11(18), 11429-11439.</p>   | <p>18 h</p> |  |
| <p>Steering Hole Transfer from the Light Absorber to Oxygen Evolution Sites for Photocatalytic Overall Water Splitting, Advanced Materials Interfaces, 2021, 8(22), 2101158-2101158.</p>          | <p>25 h</p> |  |

|                                                                                                                                                                                                                                                                 |             |                                                                                      |
|-----------------------------------------------------------------------------------------------------------------------------------------------------------------------------------------------------------------------------------------------------------------|-------------|--------------------------------------------------------------------------------------|
| <p>Smart Assembly of Sulfide Heterojunction Photocatalysts with Well-Defined Interfaces for Direct Z-Scheme Water Splitting under Visible Light, <i>ChemSusChem</i>, 2020, 13(11), 2996-3004.</p>                                                               | <p>42 h</p> | 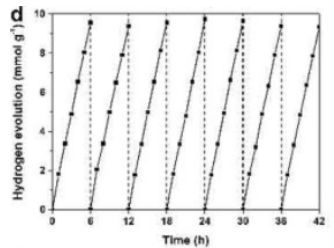   |
| <p>The Pt-free 1T/2H-MoS<sub>2</sub>/CdS/MnO<sub>x</sub> hollow core-shell nanocomposites toward overall water splitting via HER/OER synergy of 1T-MoS<sub>2</sub>/MnO<sub>x</sub>, <i>Materials Today Chemistry</i>, 2021, 21, 100528-100528.</p>              | <p>24 h</p> |    |
| <p>Development of BiOI as an effective photocatalyst for oxygen evolution reaction under simulated solar irradiation, <i>Catalysis Science &amp; Technology</i>, 2020, 10(10), 3223-3231.</p>                                                                   | <p>40 h</p> |   |
| <p>In Situ Photodeposited Construction of Pt-CdS/g-C<sub>3</sub>N<sub>4</sub>-MnO<sub>x</sub> Composite Photocatalyst for Efficient Visible-Light-Driven Overall Water Splitting, <i>ACS Applied Materials &amp; Interfaces</i>, 2020, 12(18), 20579-20588.</p> | <p>12 h</p> |  |
| <p>Temperature effect on green-synthesized Co<sub>3</sub>O<sub>4</sub>nanoparticle as photocatalyst for overall water splitting, <i>Journal of Photonics for Energy</i>, 2020, 10(4), 042006-042006.</p>                                                        | <p>12 h</p> |  |



|                                                                                                                                                                                                                                                                                                |             |                                                                                      |
|------------------------------------------------------------------------------------------------------------------------------------------------------------------------------------------------------------------------------------------------------------------------------------------------|-------------|--------------------------------------------------------------------------------------|
| <p>Graphitic Carbon Nitride Decorated with Nickel(II)-(3-Pyridyl) Benzimidazole Complexes and Pt Nanoparticles as a Cocatalyst for Photocatalytic Hydrogen Production from Water Splitting, ACS Applied Nano Materials, 2020, 3(11), 10659-10667.</p>                                          | <p>20 h</p> | 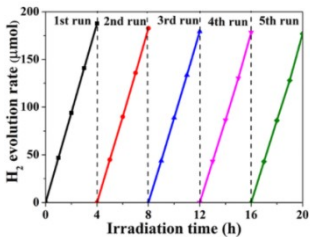   |
| <p>FeNi intermetallic compound nanoparticles wrapped with N-doped graphitized carbon: a novel cocatalyst for boosting photocatalytic hydrogen evolution, Journal of Materials Chemistry A, 2020, 8(6), 3481-3490.</p>                                                                          | <p>20 h</p> |    |
| <p>Biomass Lignin Integrated Polymeric Carbon Nitride for Boosted Photocatalytic Hydrogen and Oxygen Evolution Reactions, Molecular Catalysis, 2022, 518, 112064-112064.</p>                                                                                                                   | <p>25 h</p> |  |
| <p>Constructing La<sub>x</sub>Co<sub>y</sub>O<sub>3</sub> Perovskite Anchored 3D g-C<sub>3</sub>N<sub>4</sub> Hollow Tube Heterojunction with Proficient Interface Charge Separation for Stimulating Photocatalytic H<sub>2</sub> Production, Energy &amp; Fuels, 2021, 35(11), 9727-9746.</p> | <p>16 h</p> |  |

|                                                                                                                                                                                                                             |              |                                                                                      |
|-----------------------------------------------------------------------------------------------------------------------------------------------------------------------------------------------------------------------------|--------------|--------------------------------------------------------------------------------------|
| <p>Stable and efficient <math>\text{Ti}_3\text{C}_2</math> MXene/<math>\text{MAPbI}_3</math>-HI system for visible-light-driven photocatalytic HI splitting, <i>Journal of Power Sources</i>, 2022, 522, 231006-231006.</p> | <p>50 h</p>  | 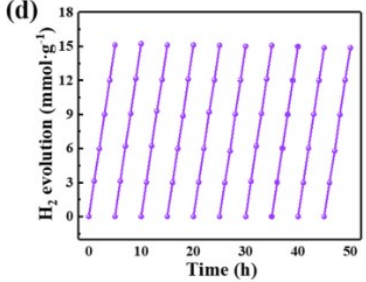   |
| <p>A Novel Porous Ti-Squarate as Efficient Photocatalyst in the Overall Water Splitting Reaction under Simulated Sunlight Irradiation, <i>Advanced Materials</i>, 2021, 33(52), 2106627-2106627.</p>                        | <p>216 h</p> |    |
| <p>Nickel phosphonate MOF as efficient water splitting photocatalyst, <i>Nano Research</i>, 2021, 14(2), 450-457</p>                                                                                                        | <p>110 h</p> |   |
| <p>Semiconductor-based photocatalysts for photocatalytic and photoelectrochemical water splitting: will we stop with photocorrosion? <i>Journal of Materials Chemistry A</i>, 2020, 8(5), 2286-2322.</p>                    | <p>60 h</p>  |  |
| <p>Carbon quantum dots enriching molecular nickel polyoxometalate over CdS semiconductor for photocatalytic water splitting, <i>Applied Catalysis B: Environmental</i>, 2021, 293, 120214-120214.</p>                       | <p>96 h</p>  |  |
